# Supplementary material
Source: PubMed Central journal article supplement (PMC8686188)

# Supplementary Figure 1

## A

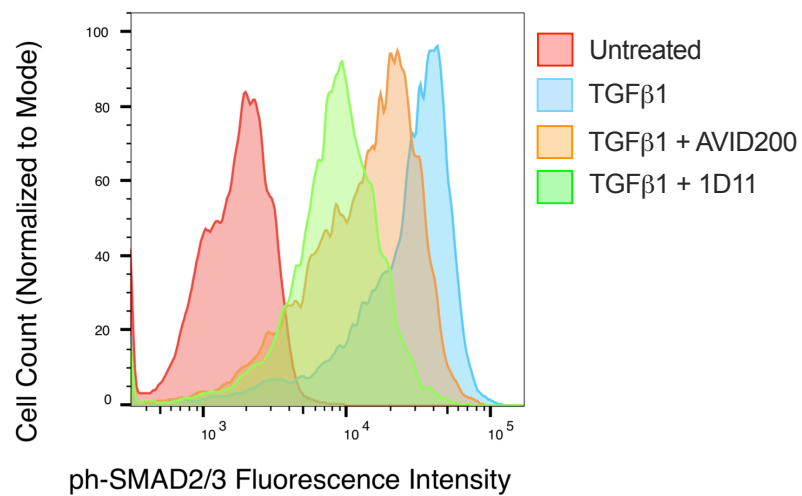

## B

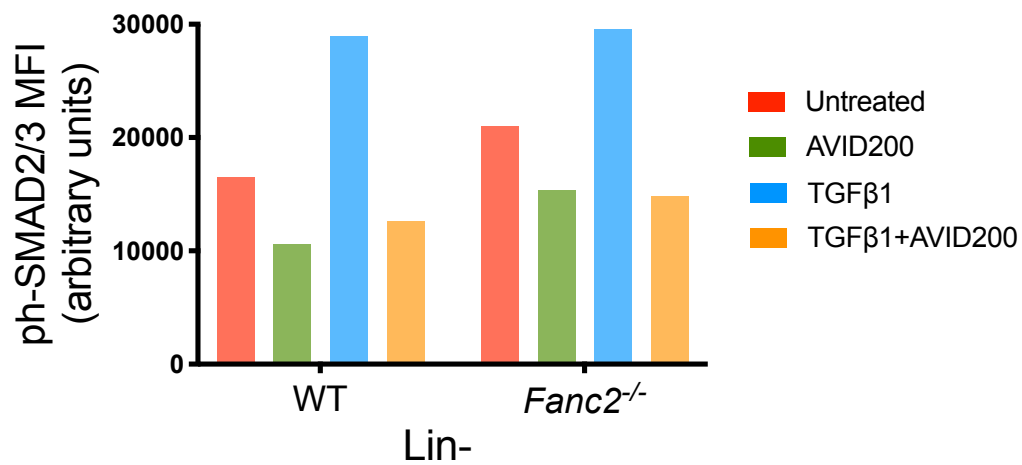

## C

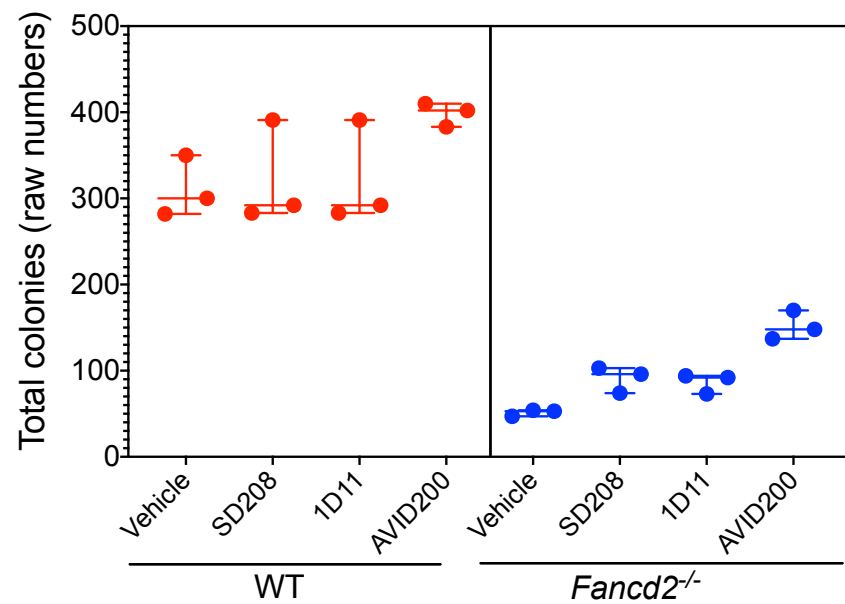

## D

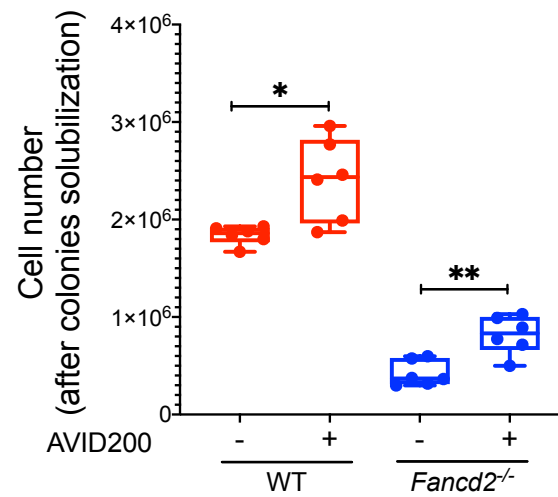

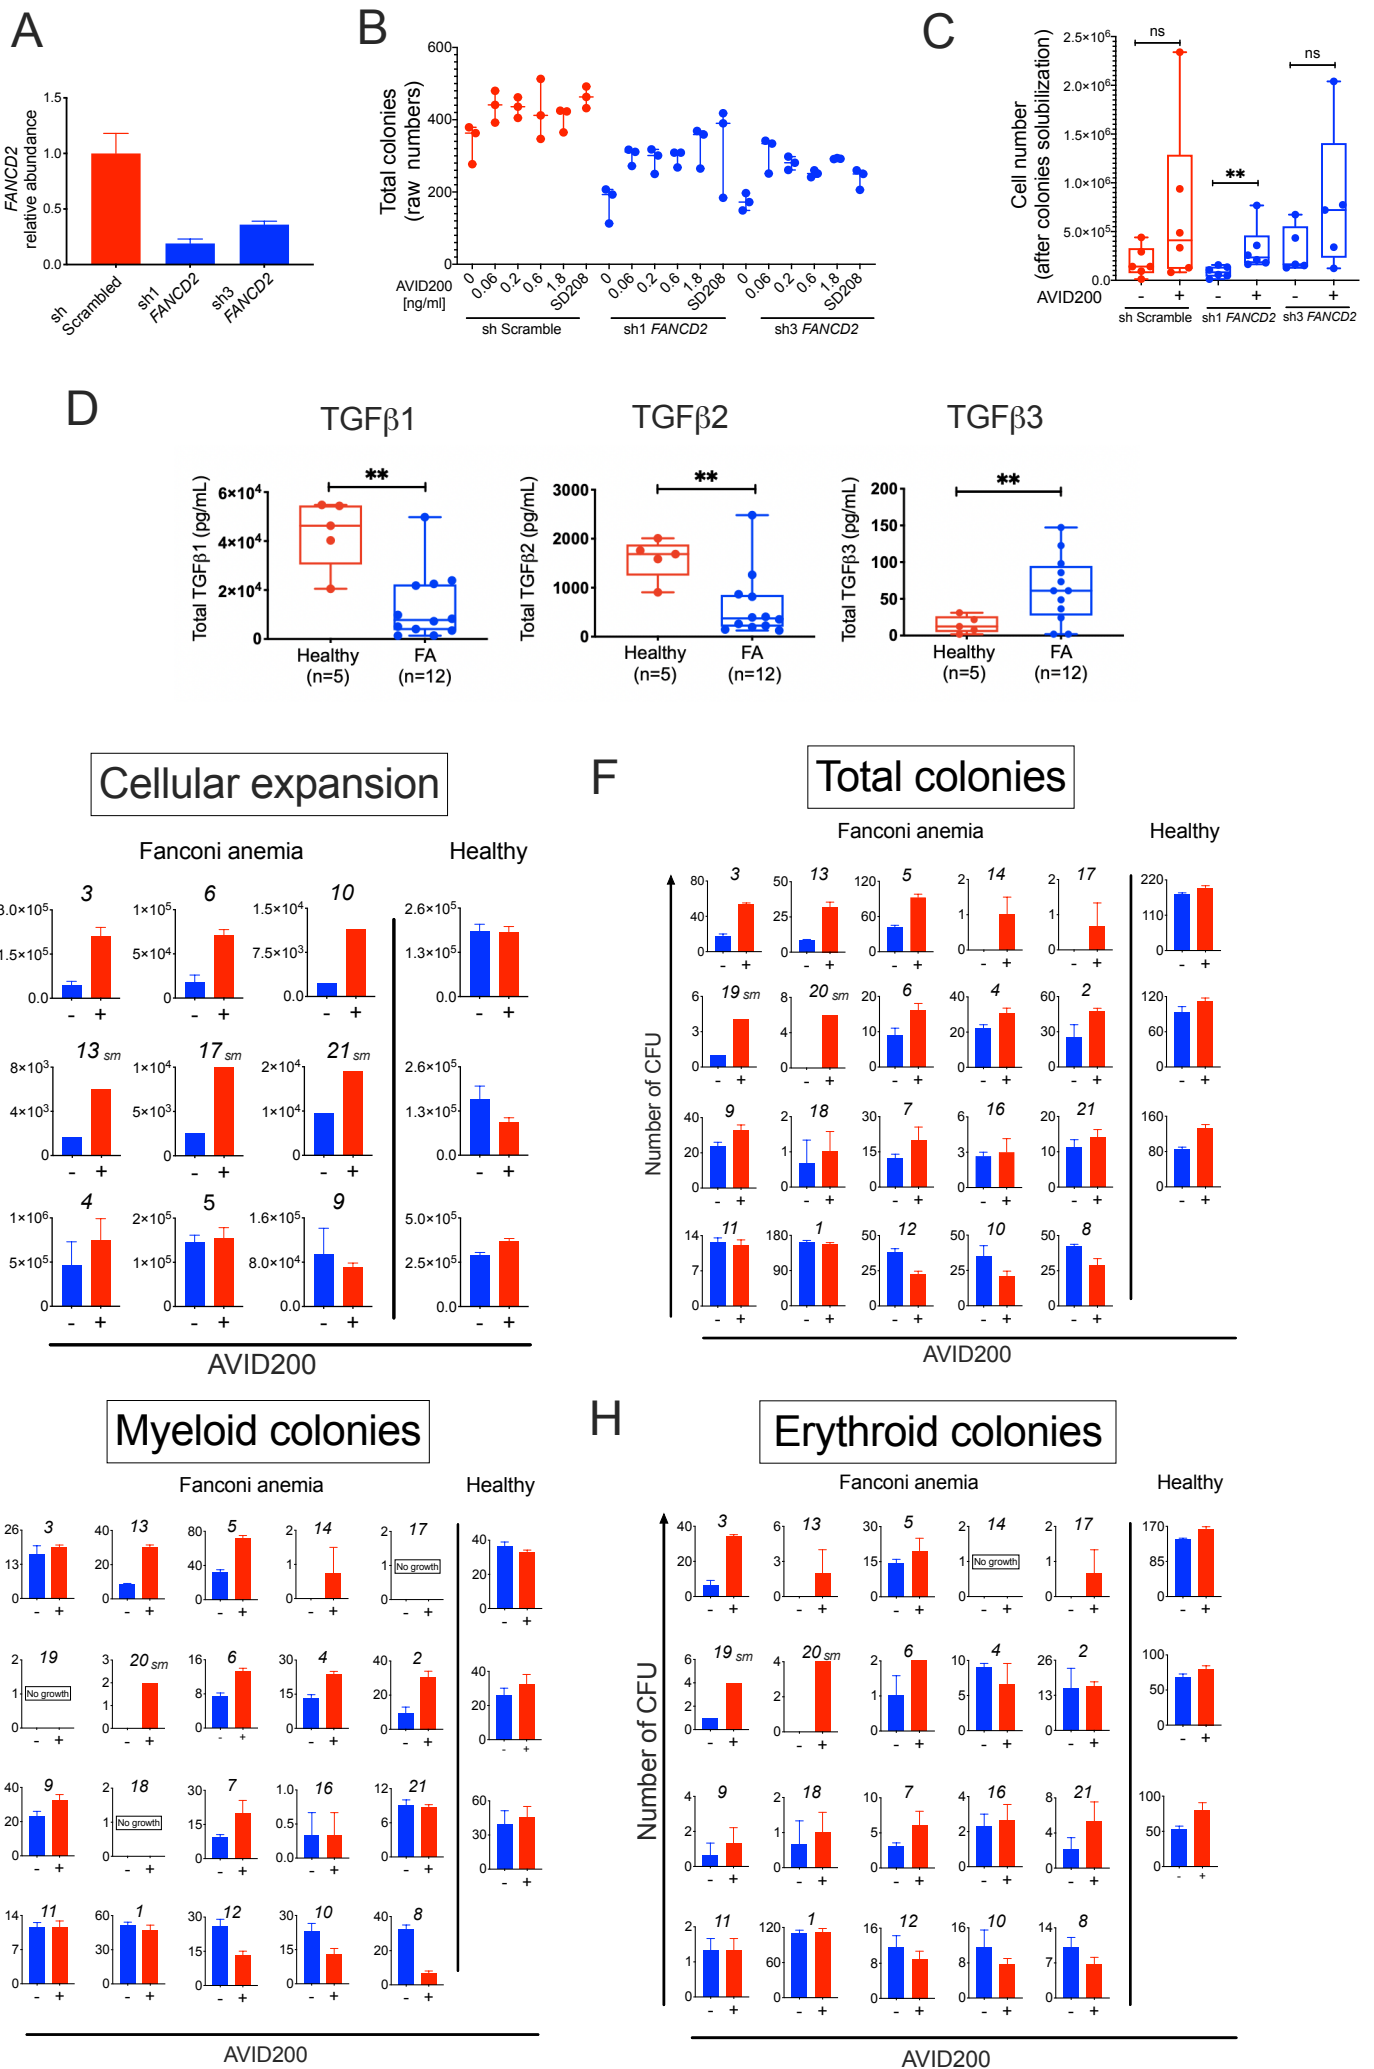

# Supplementary Figure 3

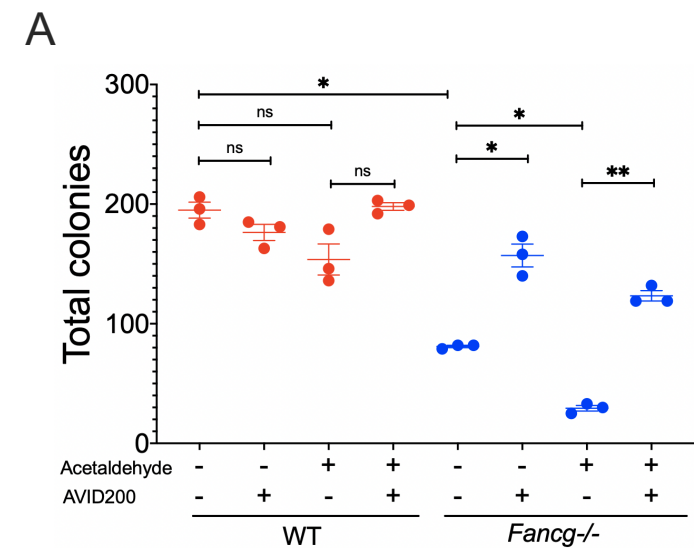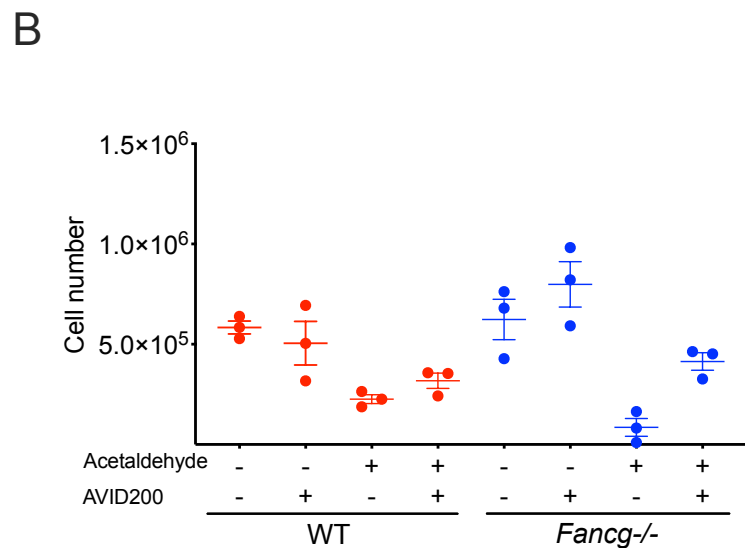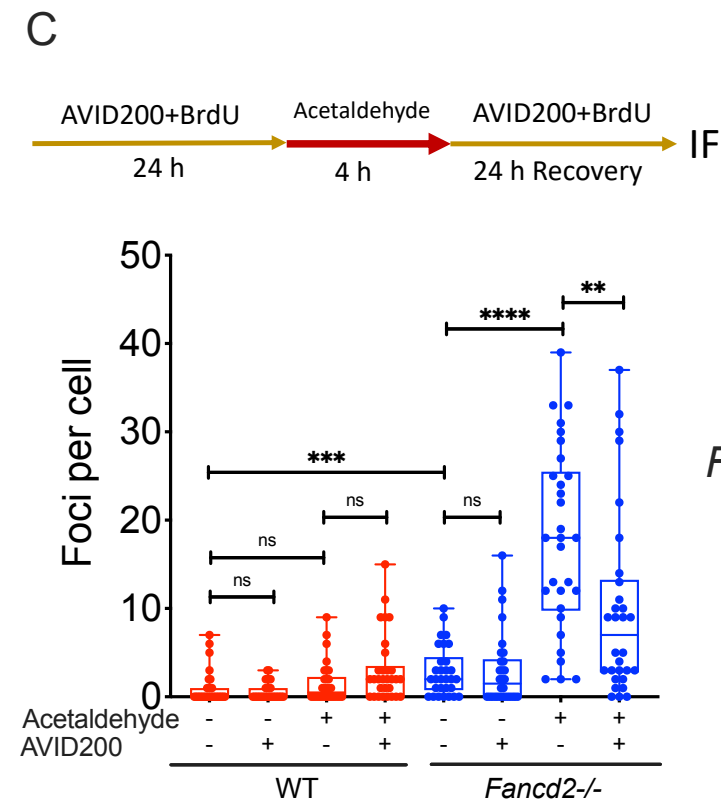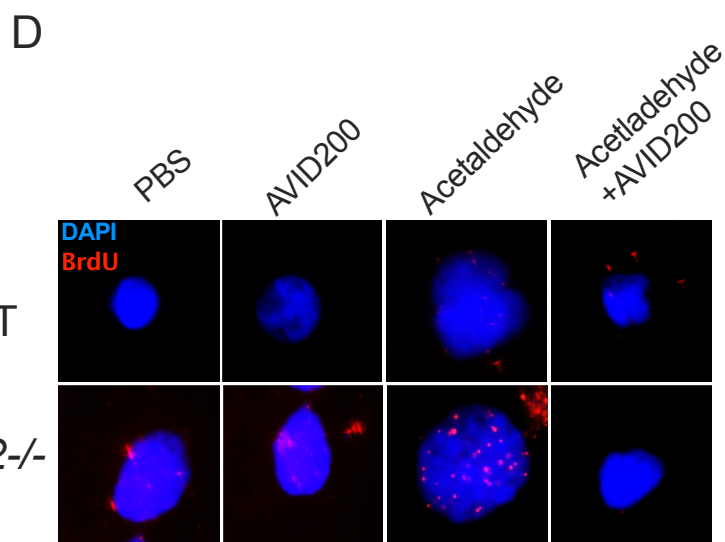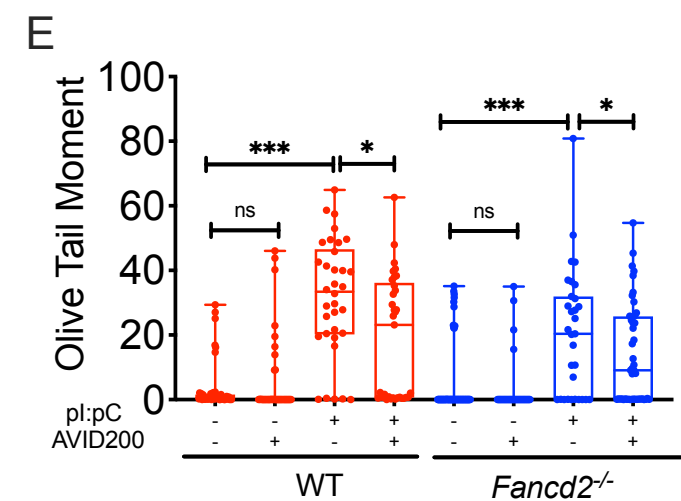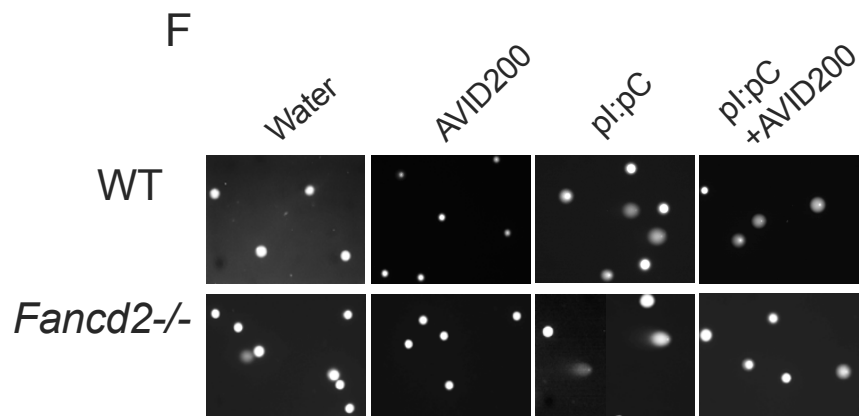

Supplementary Figure 4

A

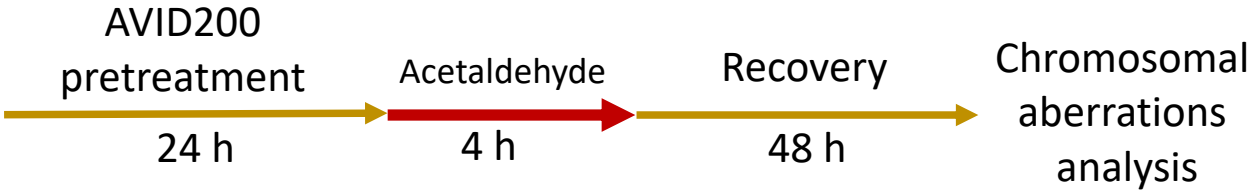

### Acetaldehyde induced chromosomal aberrations

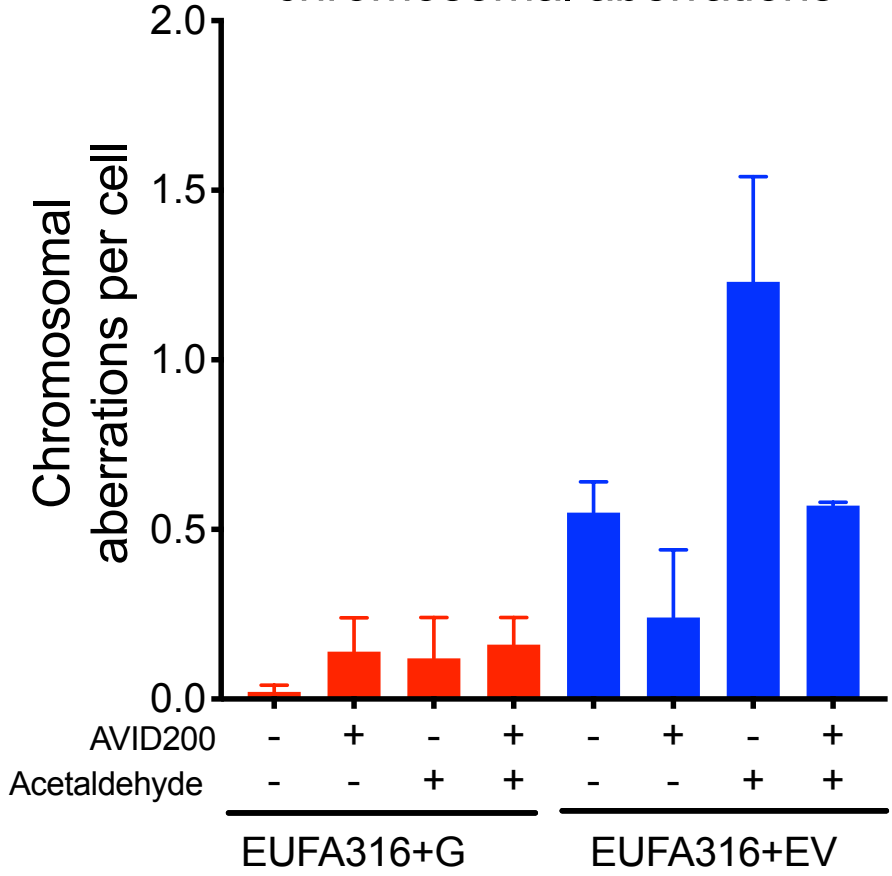

Supplement: NIHMS1650897-supplement-Supp_Figures.pdf [file NIHMS1650897-supplement-Supp_Figures.pdf]
